# Supplementary material
Source: MDPI journal article supplement (https://www.mdpi.com/2073-4344/13/2/388)
Supplement: s1 [file s1]

## Supplementary data#

**Table S1.** Specific surface area comparison of previous studies with the results reported in this study.

| Biochar Name | Pyrolysis Temperature | $S_{BET}$ ( $m^2/g$ ) | Reference  |
|--------------|-----------------------|-----------------------|------------|
| Biochar      | 600°C                 | 295.0                 | [56]       |
| MFSCBB-MC    | 600°C                 | 305.4                 | [43]       |
| SCB550       | 550°C                 | 299.6                 | This Study |
| SCB550-Fe    | 550°C                 | 318.4                 | This Study |

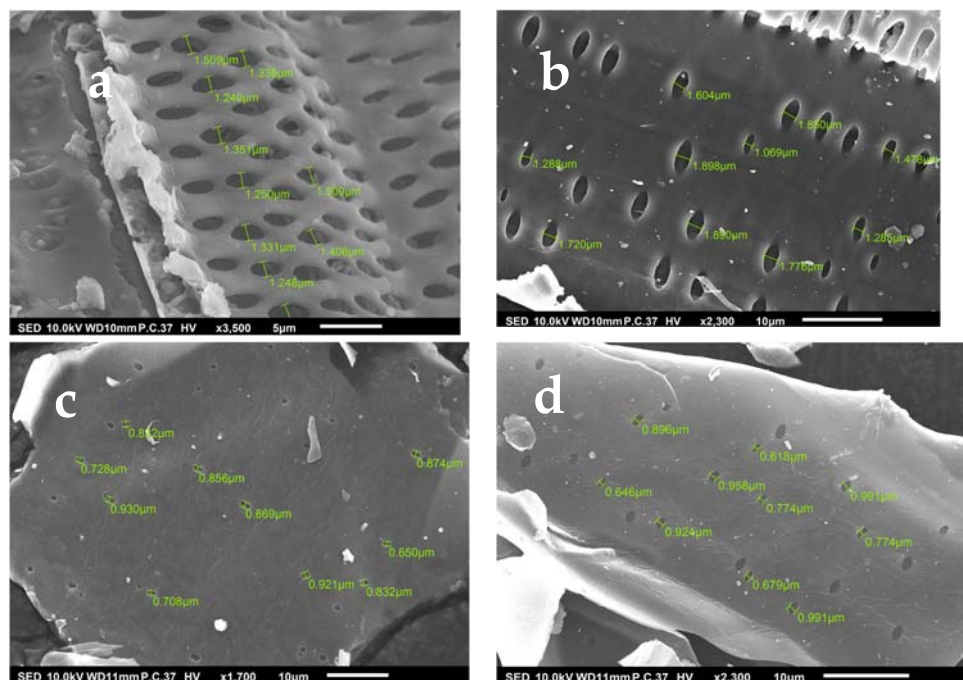

**Figure S1.** Pore sizes of pristine biochars pyrolyzed at 350 (a), 450 (b), 550 (c), and 650° (d).

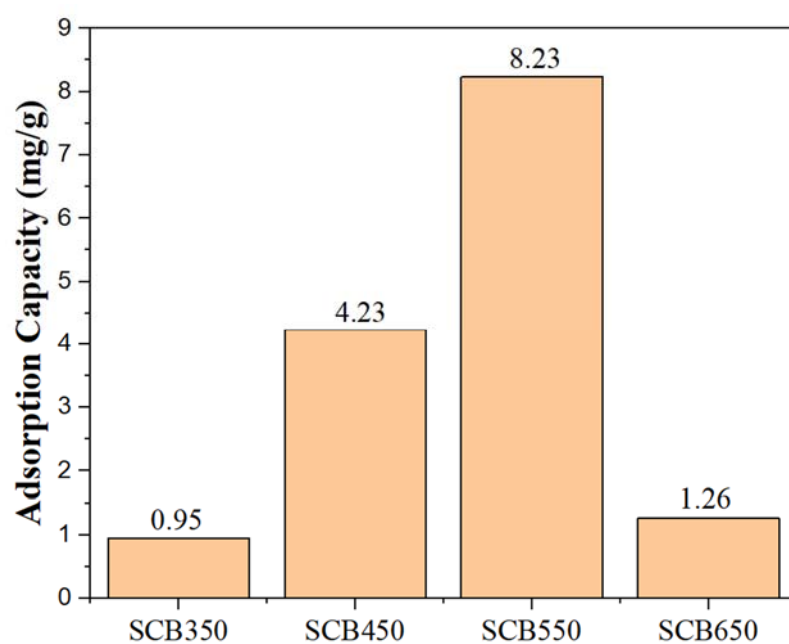

**Figure S2.** Adsorption capacities of biochar prepared at different pyrolysis temperature.

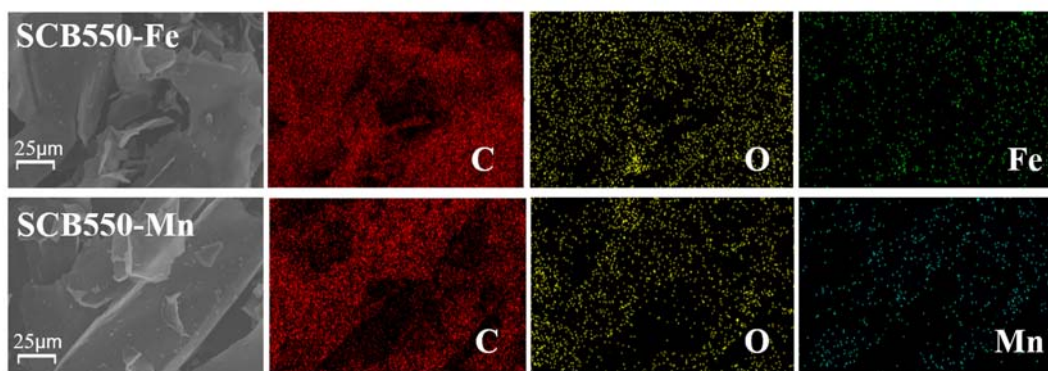

**Figure S3.** EDS images of catalytic biochar SCB550-Fe and SCB550-Mn.

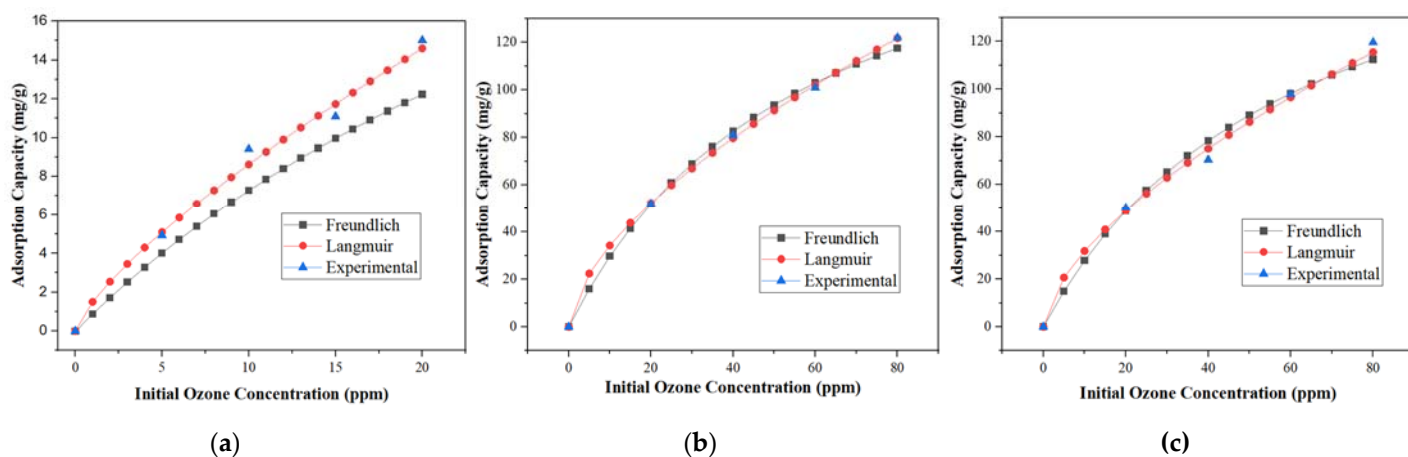

**Figure S4.** Langmuir and Freundlich model fitting of pristine biochar SCB550 (a), and catalytic biochar SCB550-Fe (b) and SCB550-Mn (c) isothermal data.

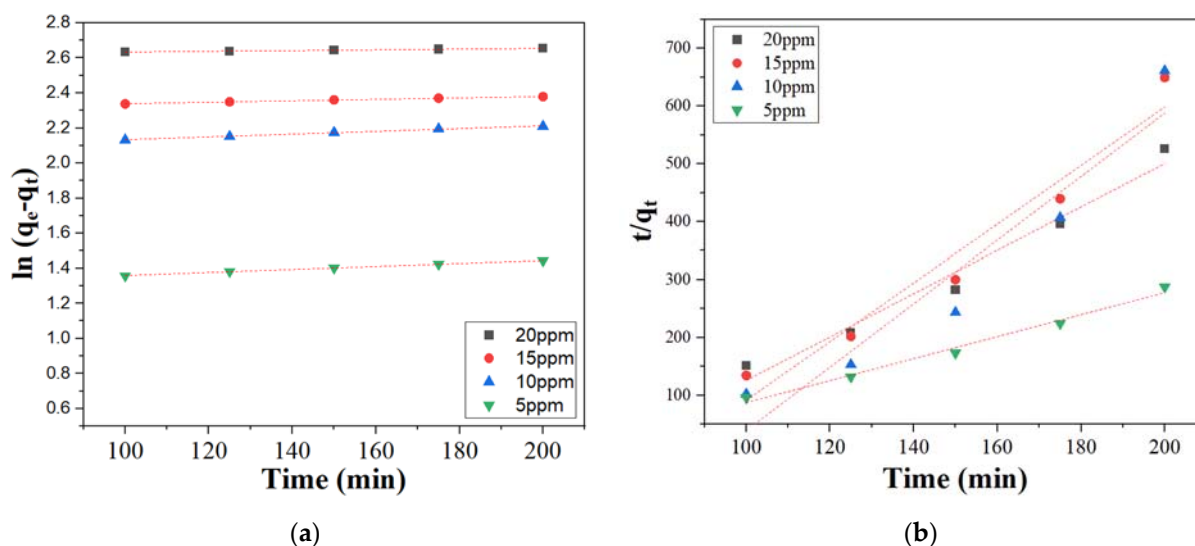

**Figure S5.** Pseudo-first (a) and pseudo-second (b) order kinetic modelling of SCB550.

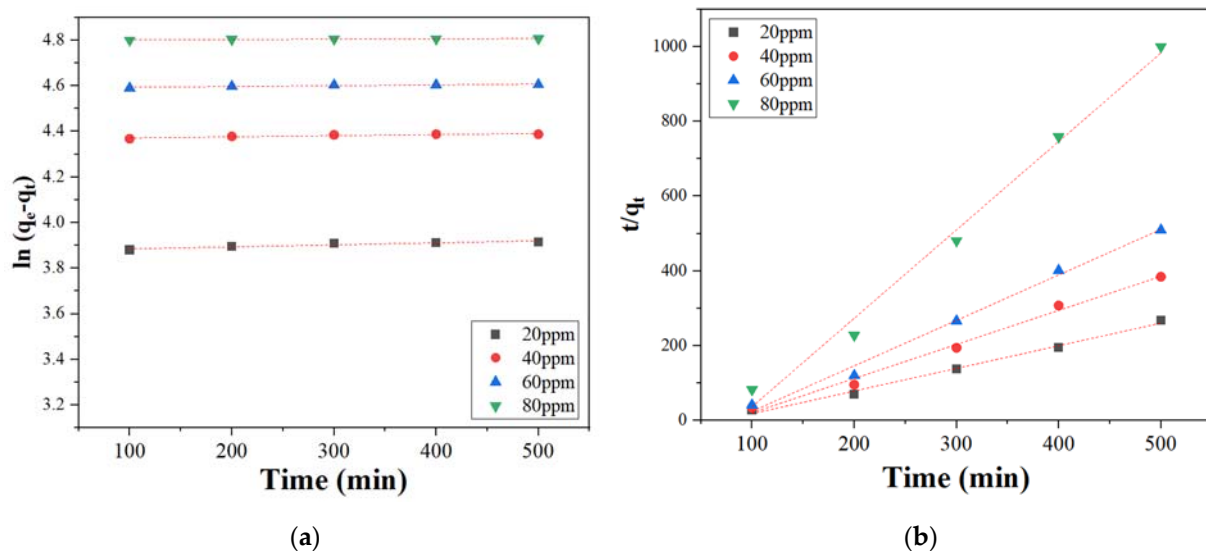

Figure S6: Pseudo-first (a) and pseudo-second (b) order kinetic modelling of SCB550-Fe

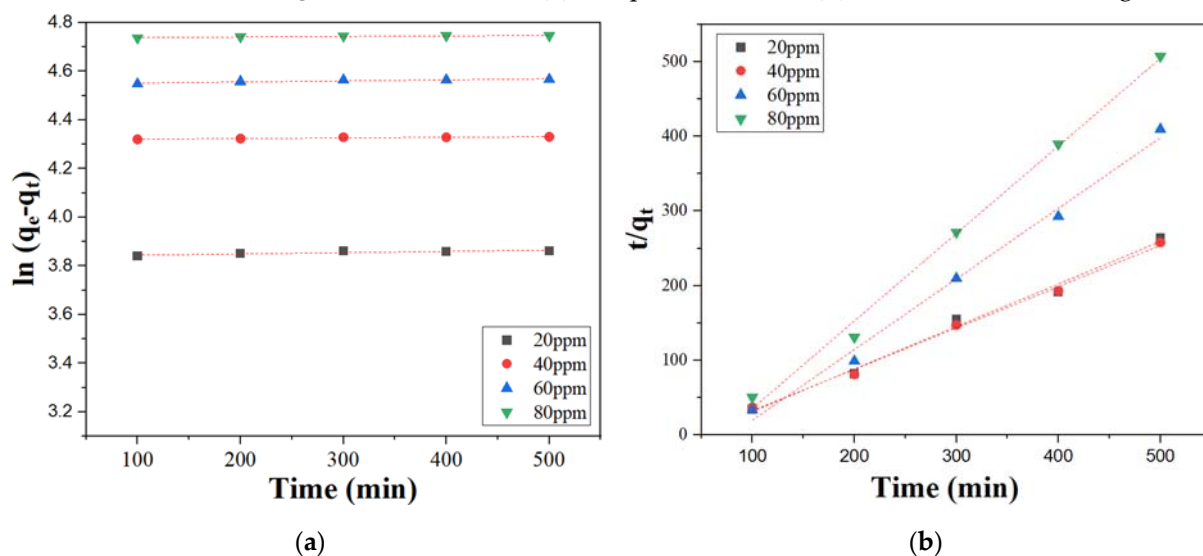

Figure S7: Pseudo-first (a) and pseudo-second (b) order kinetic modelling of SCB550-Mn.

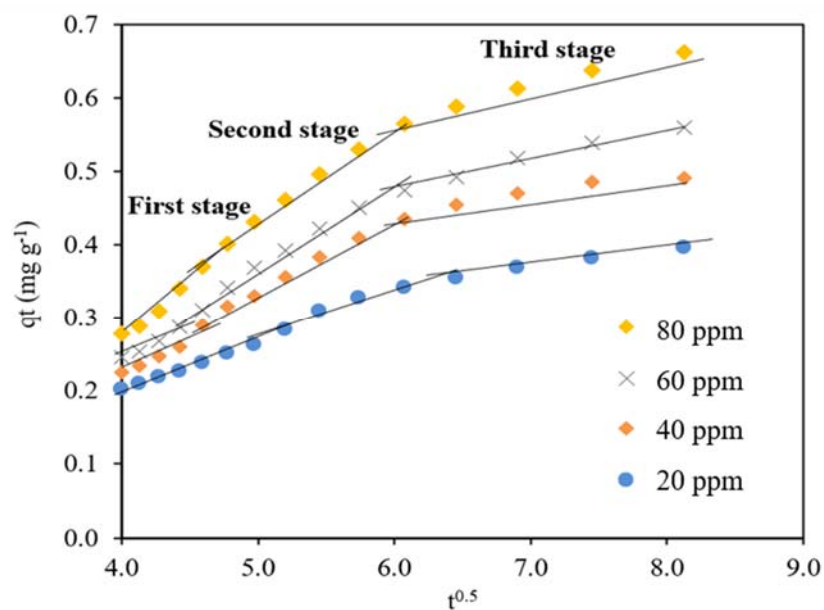

**Figure S8.** Intraparticle diffusion modelling of SCB550-Fe.

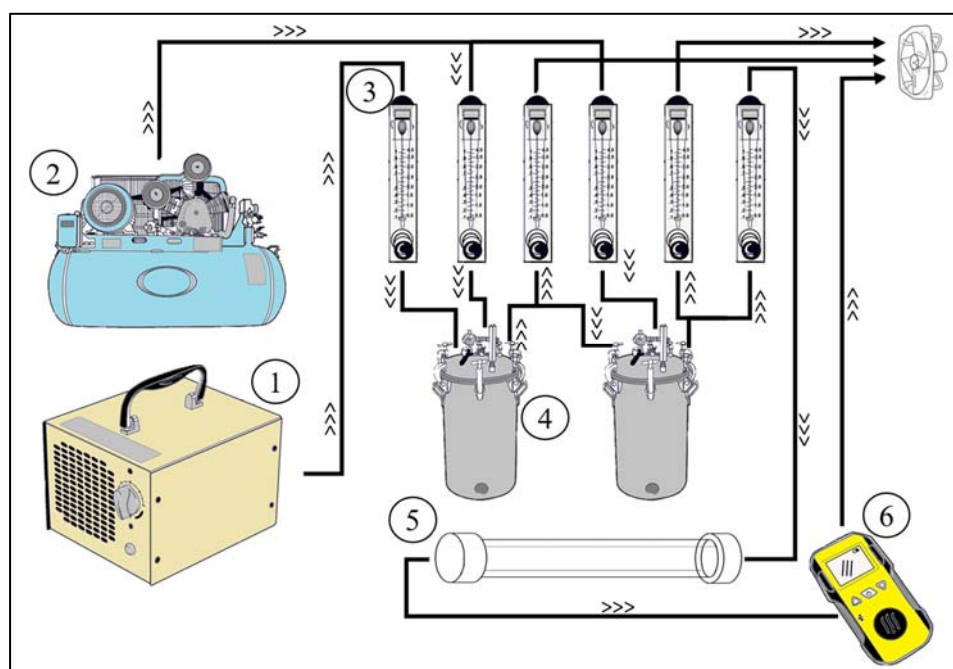

**Figure S9.** Schematic diagram of ozone adsorption set-up utilizing an ozone generator (1), air compressor (2), flowmeters (3), isothermal pressure tanks (4), quartz tube reactor (5), and ozone detector (6).
